# Supplementary material for: A 7-year dataset for driving and evaluating snow models at an Arctic site (Sodankylä, Finland)
Source: Copernicus journal article supplement (doi:10.5194/gi-5-219-2016), 2016-06-16

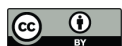

*Supplement of*

## **A 7-year dataset for driving and evaluating snow models at an Arctic site (Sodankylä, Finland)**

**Richard Essery et al.**

*Correspondence to:* Richard Essery ([richard.essery@ed.ac.uk](mailto:richard.essery@ed.ac.uk))

The copyright of individual parts of the supplement might differ from the CC-BY 3.0 licence.

# A 7-year dataset for driving and evaluating snow models at an arctic site (Sodankylä, Finland)

Richard Essery, Anna Kontu, Juha Lemmetyinen, Marie Dumont and Cécile B Ménard

## Supplementary figures

**Figure S1.** Scatter plot and statistics comparing in situ measurements and ERA-Interim forecasts of longwave radiation averaged over periods of 3 hours (blue dots) and a day (red dots).

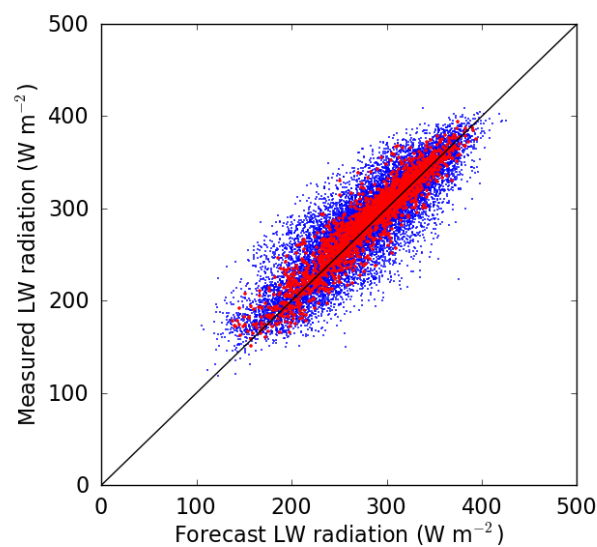

| Period   | Bias ( $\text{W m}^{-2}$ ) | Root mean square error ( $\text{W m}^{-2}$ ) | Correlation |
|----------|----------------------------|----------------------------------------------|-------------|
| 3 hours  | -5.1                       | 26.7                                         | 0.88        |
| 24 hours | -5.1                       | 16.9                                         | 0.94        |

**Figure S2.** Profiles of snow density from manual measurements (black dots), dielectric measurements (white dots) and Crocus simulations (lines).

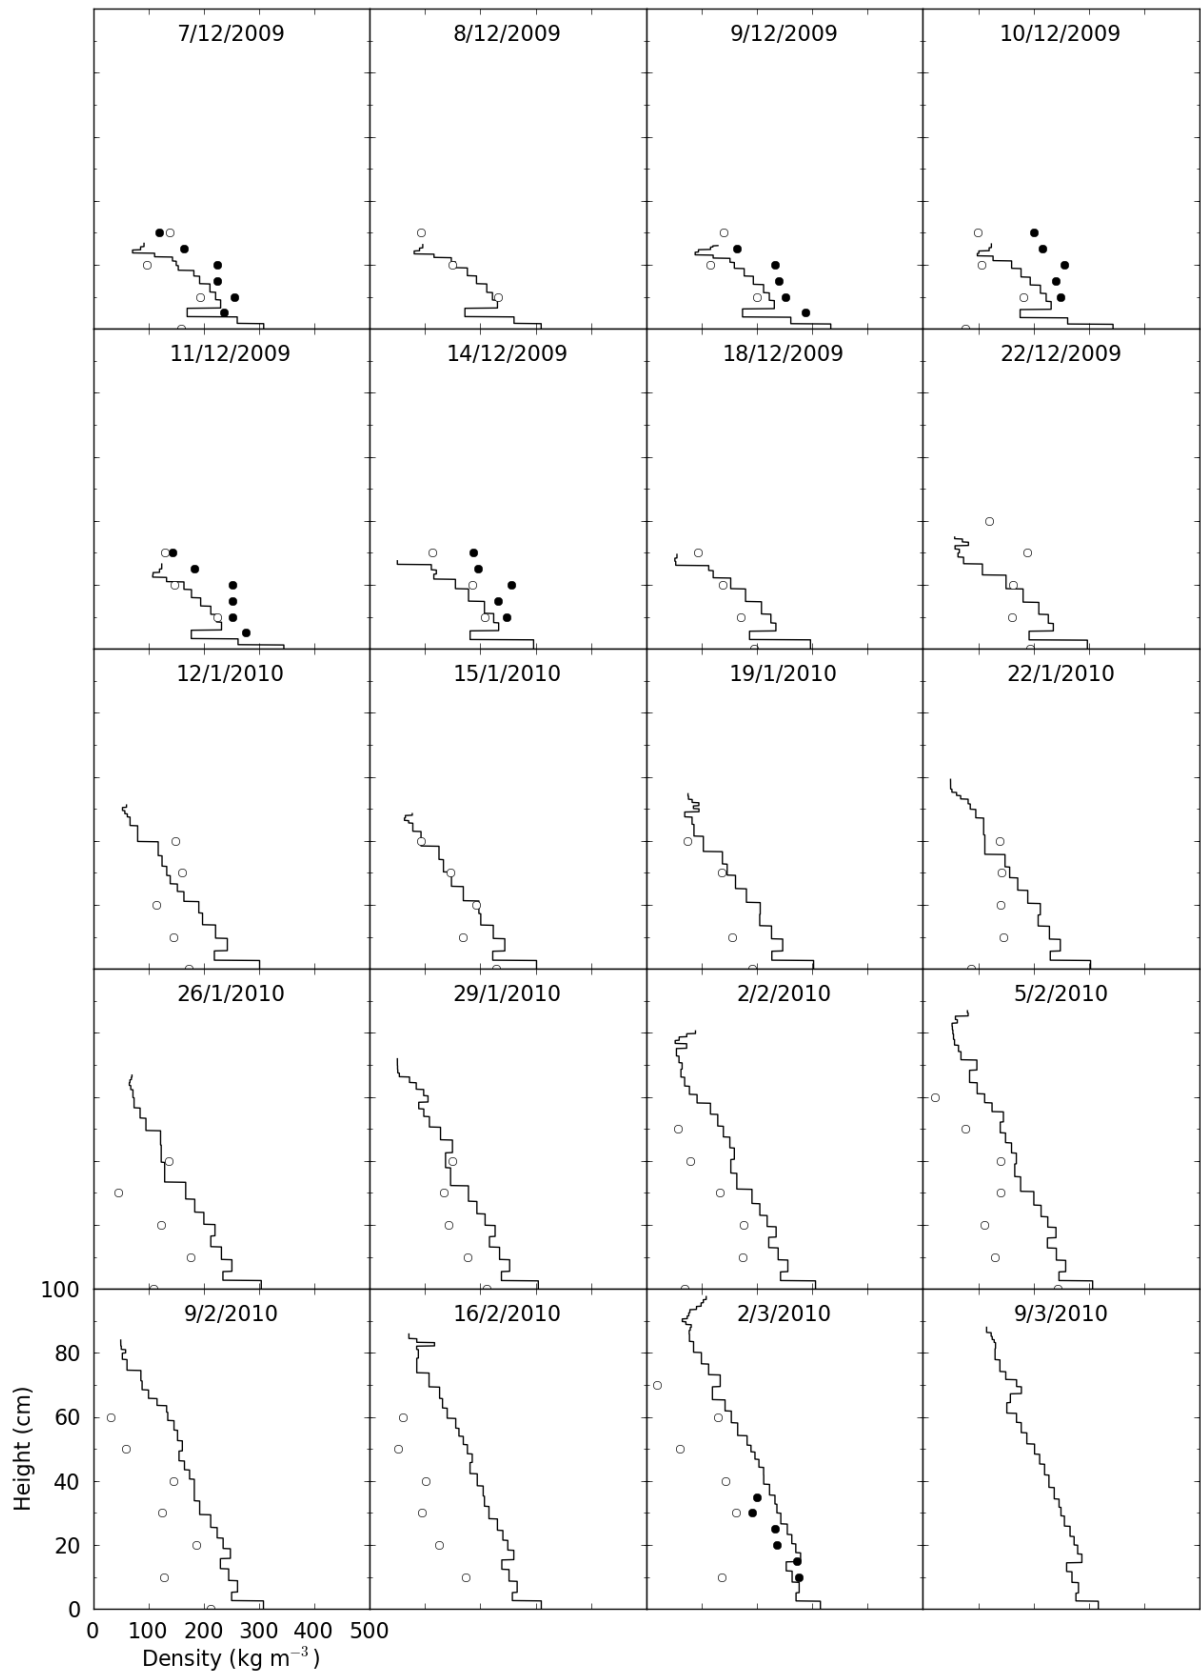

**Figure S2. Continued**

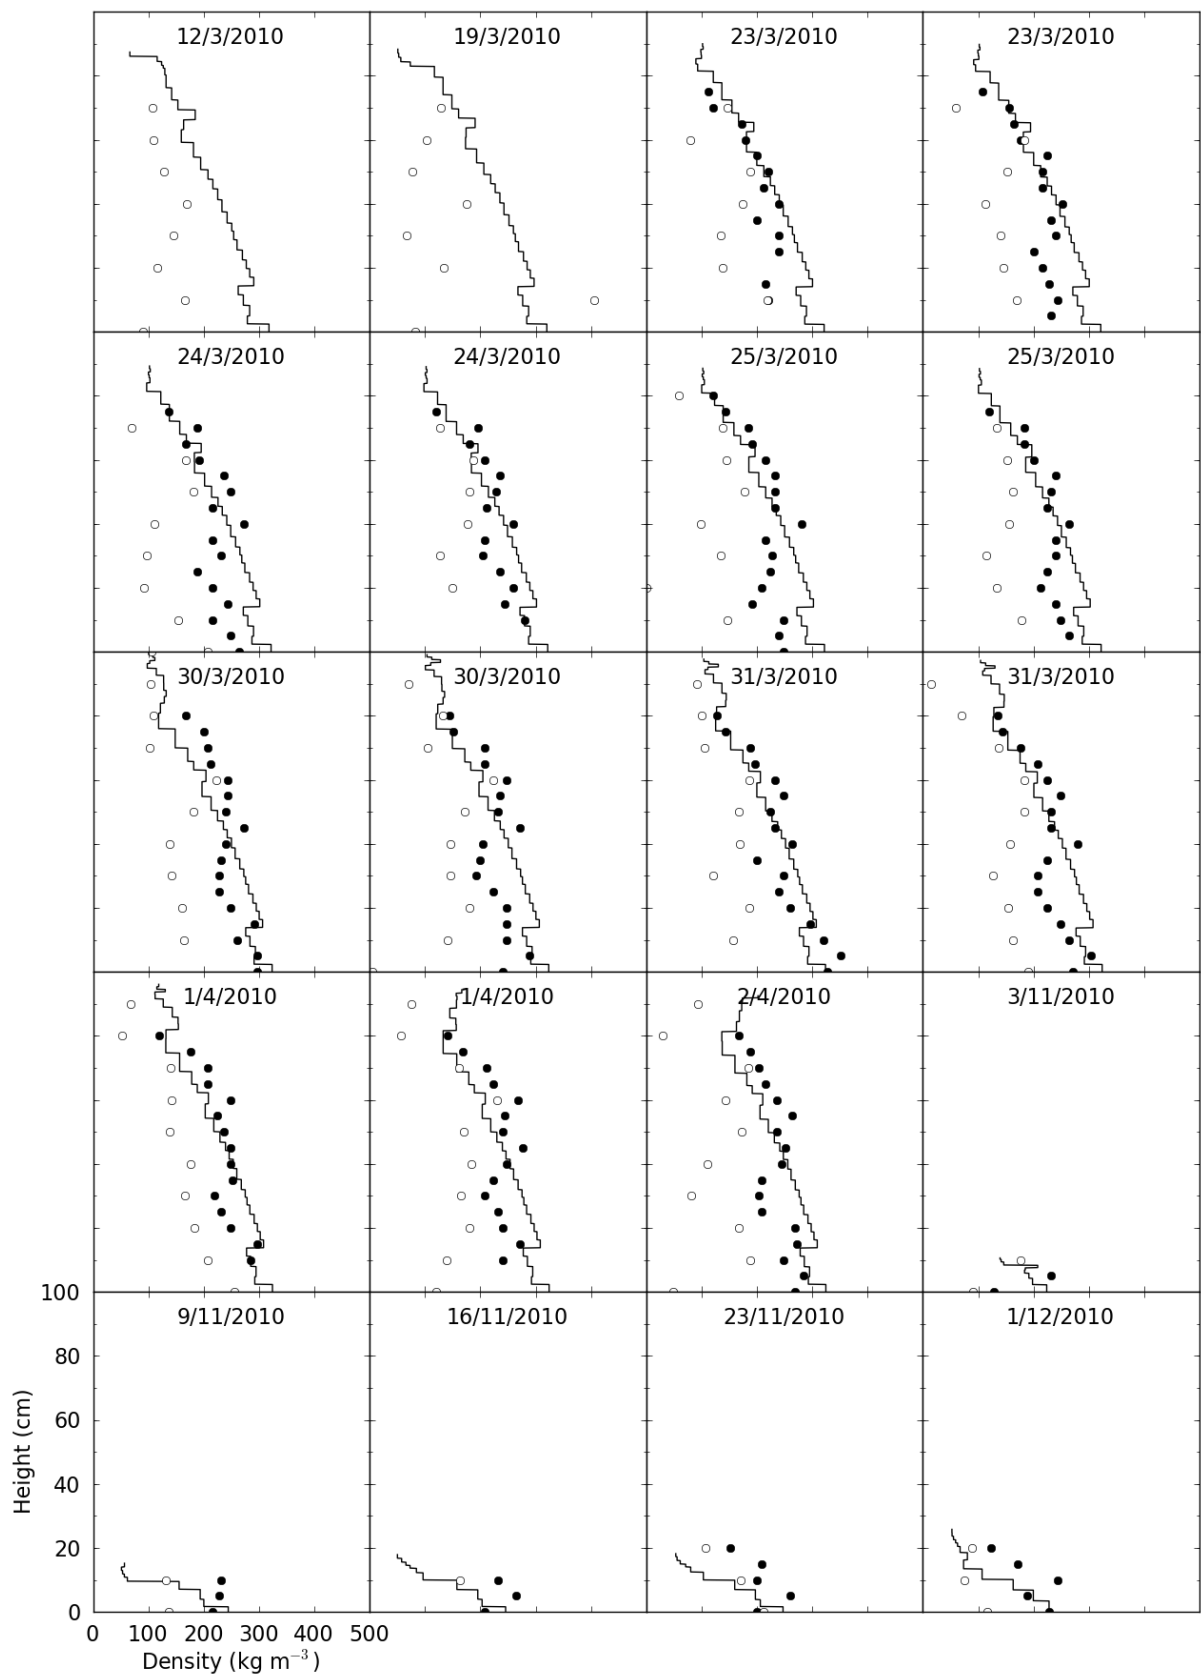

**Figure S2.** Continued

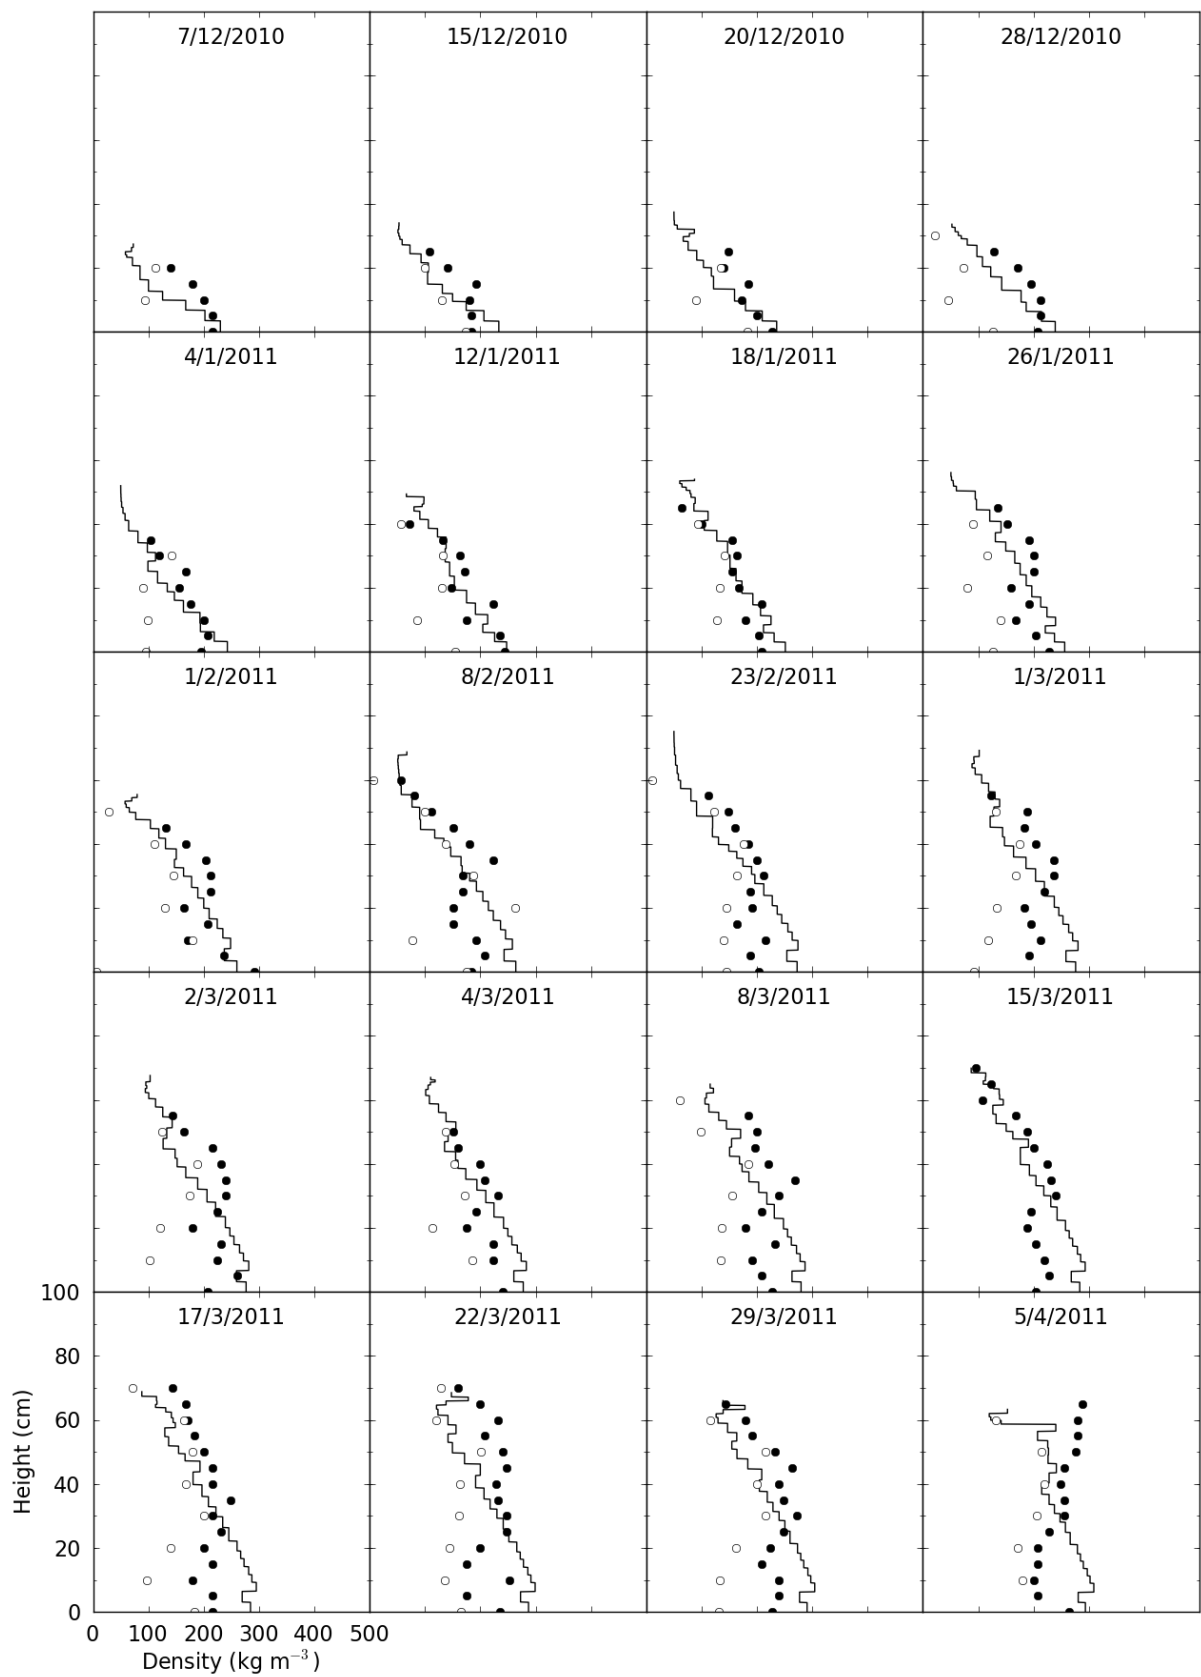

**Figure S2.** Continued

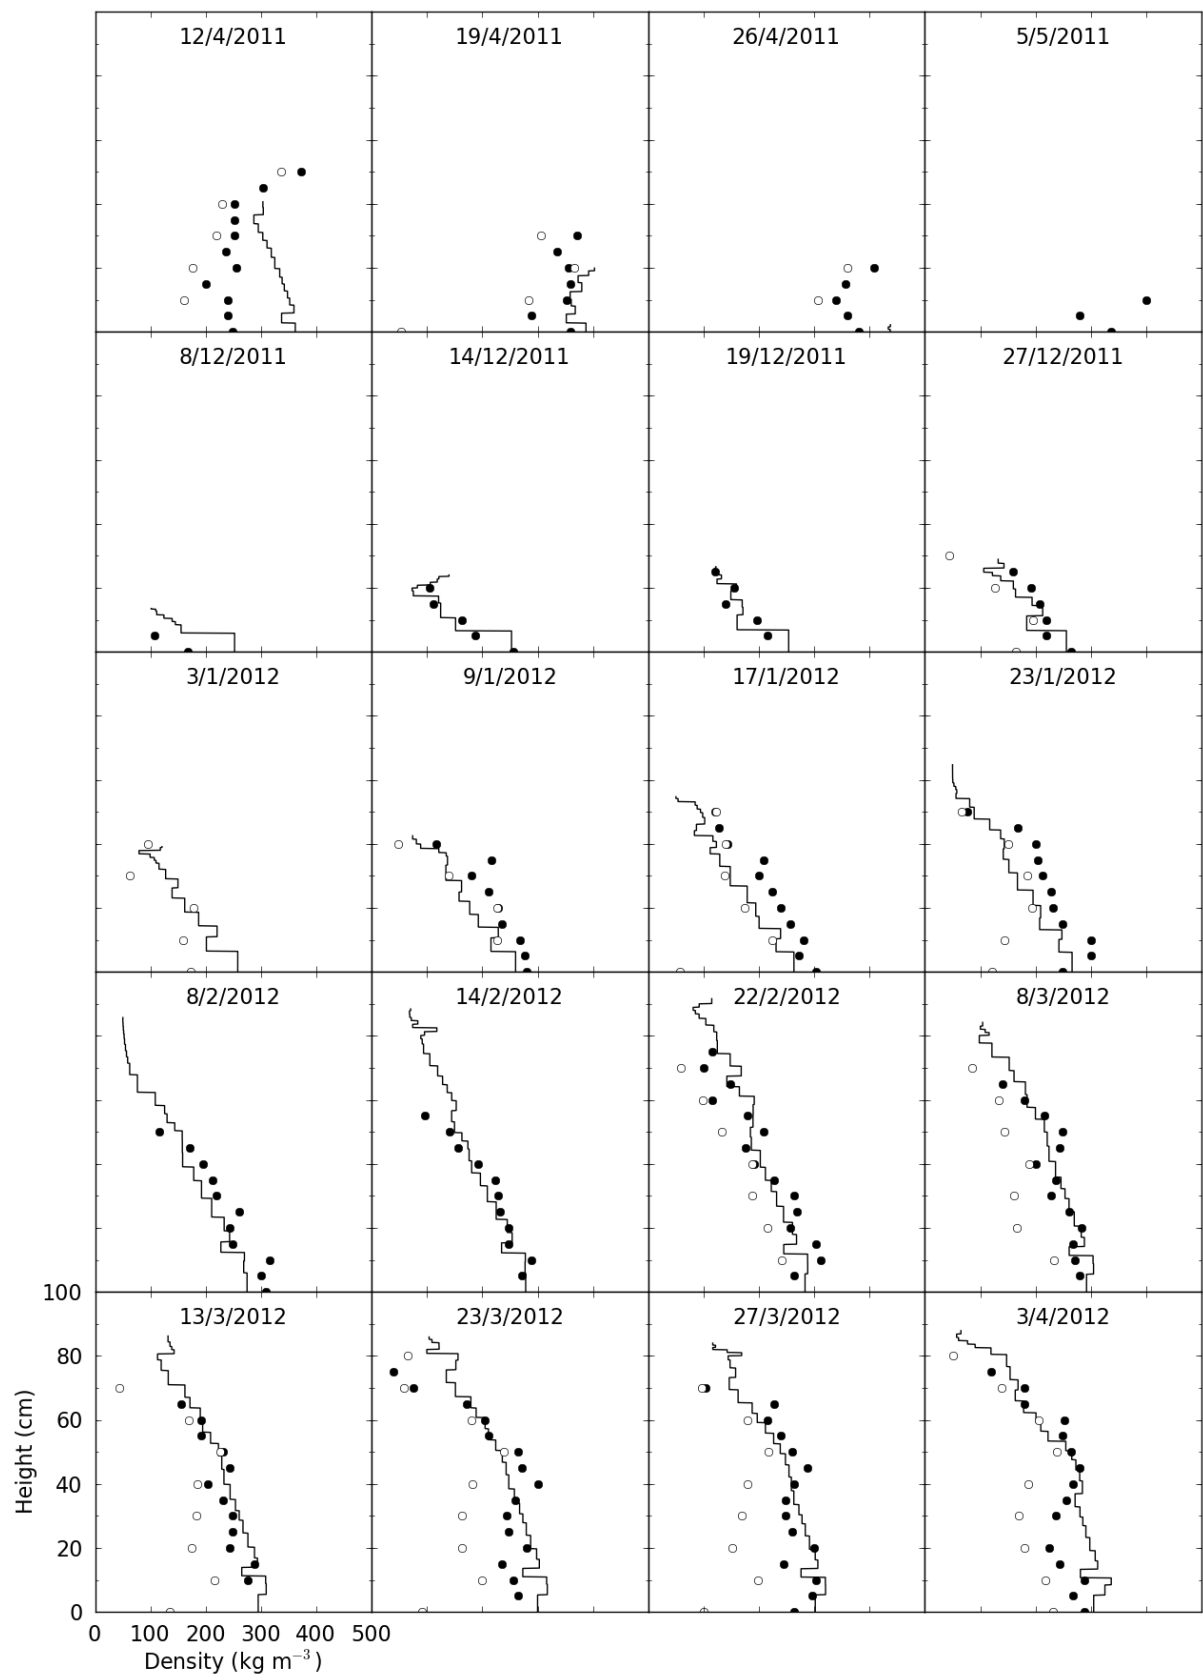

**Figure S2.** Continued

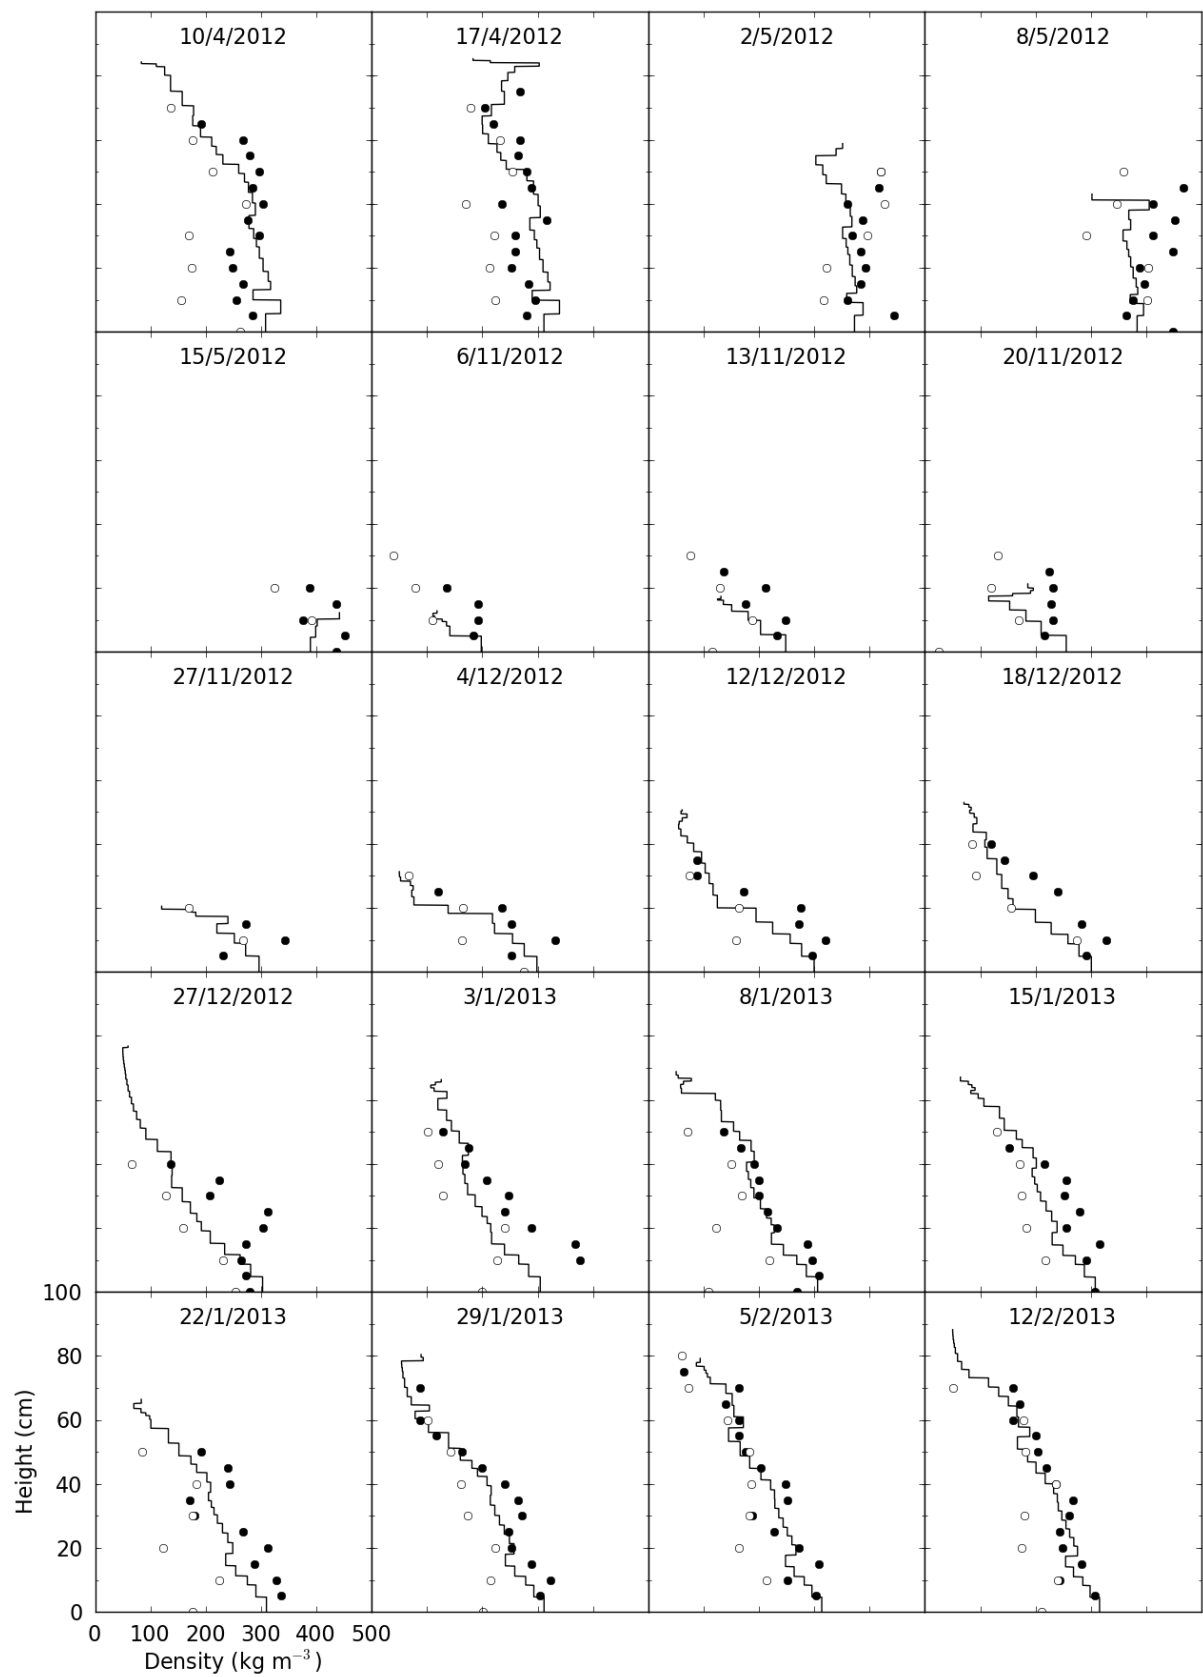

**Figure S2.** Continued

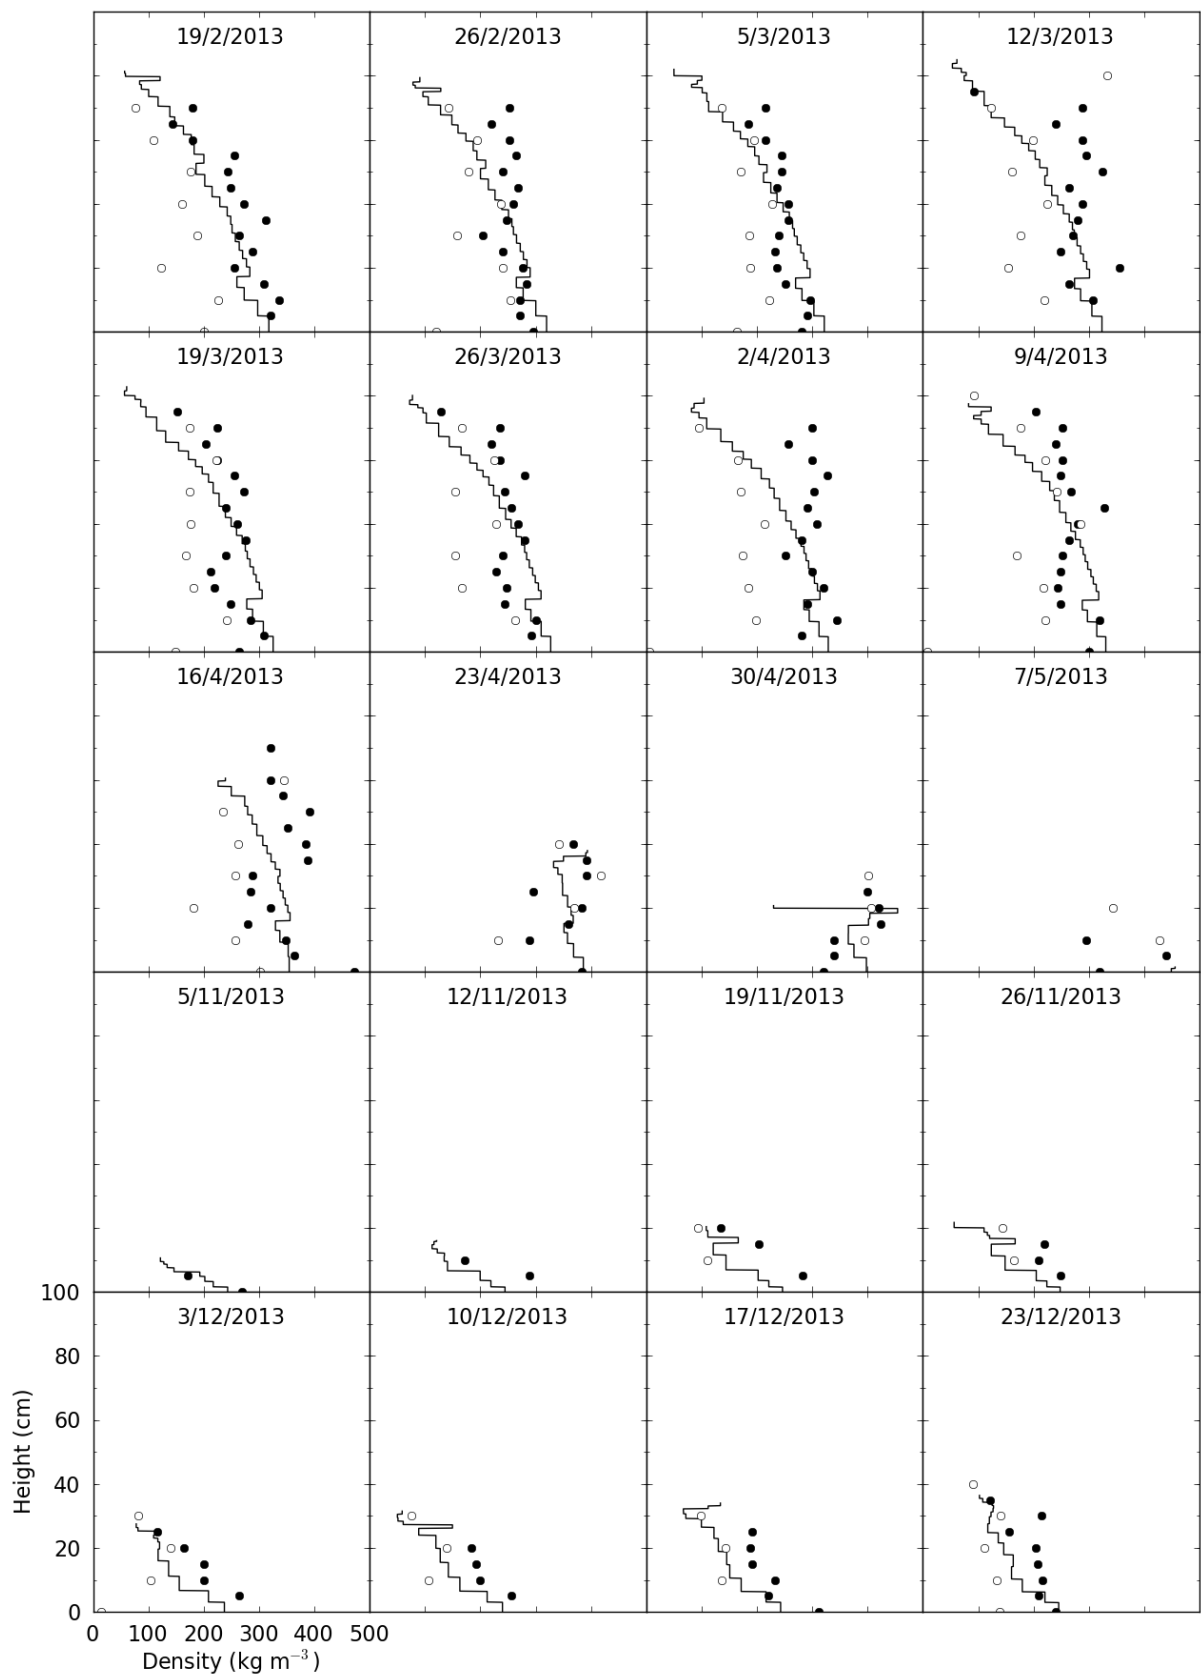



**Figure S2. Continued**

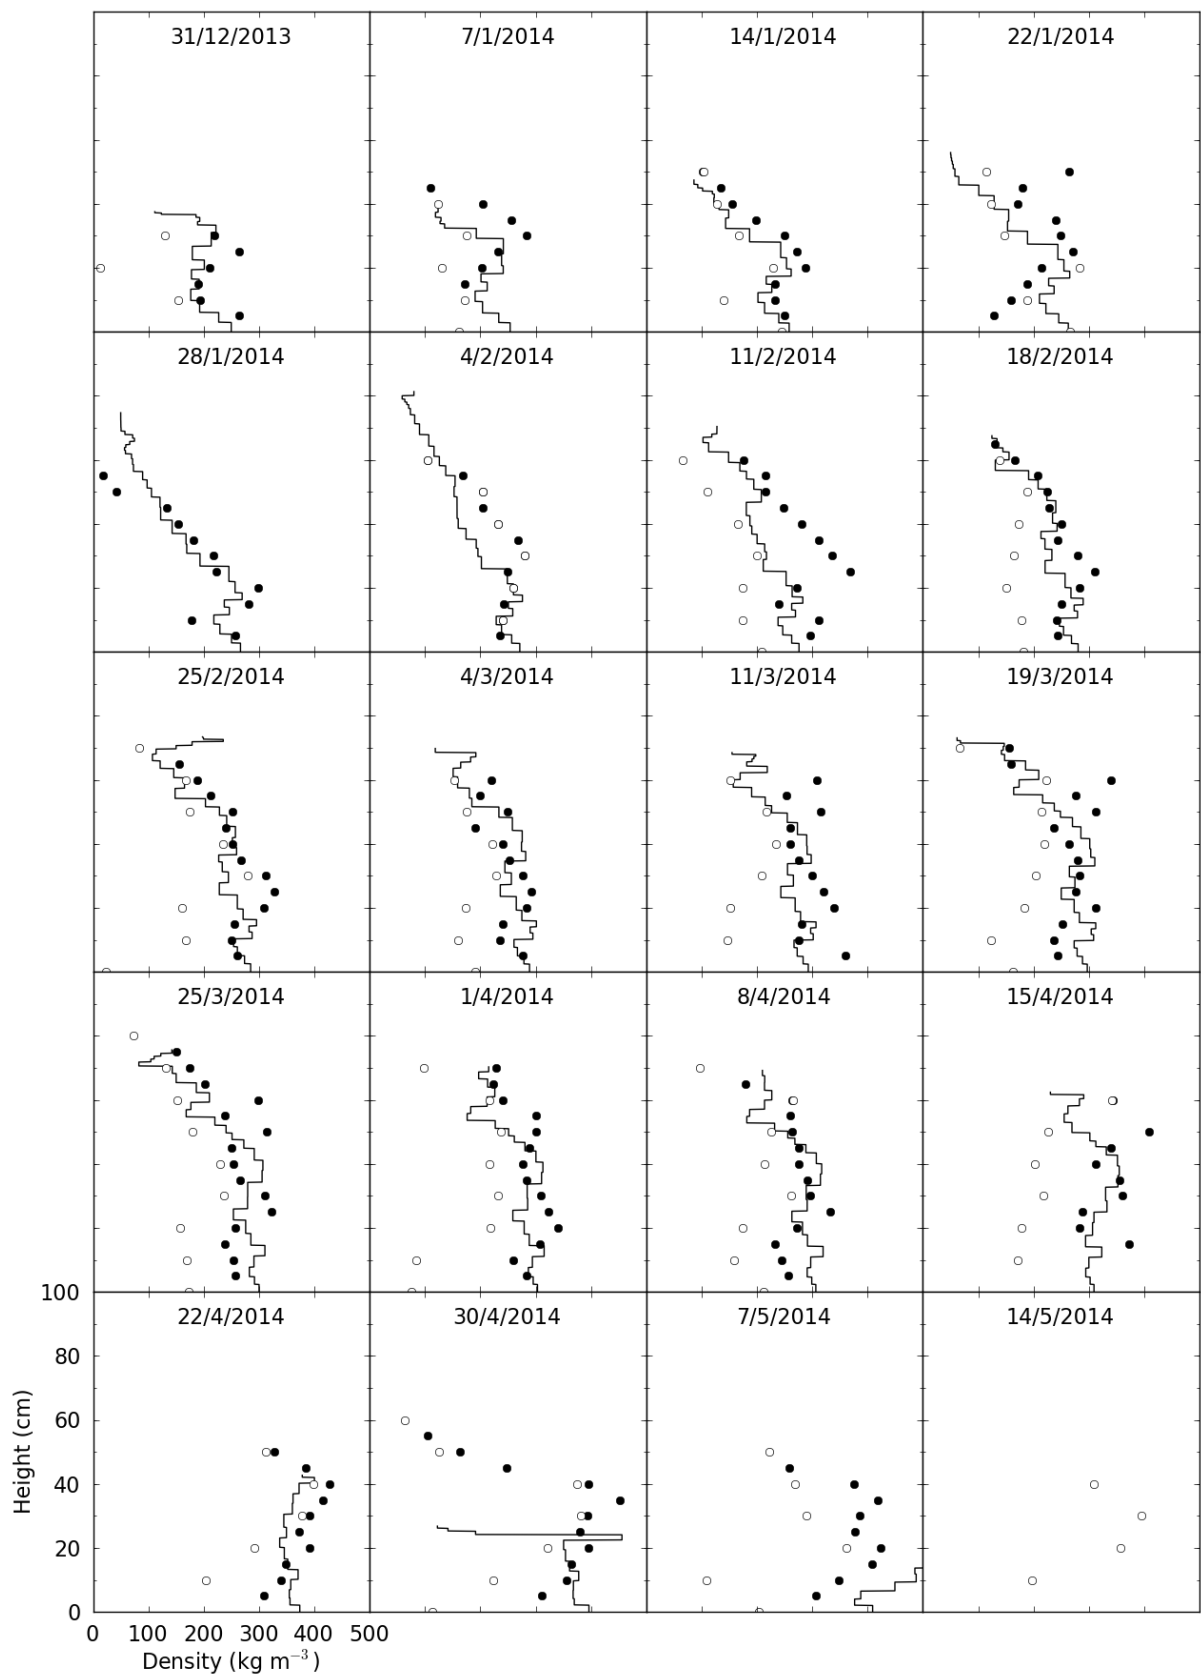

**Figure S3.** Profiles of snow temperature from manual measurements (black dots), thermistors (white dots) and Crocus simulations (lines).

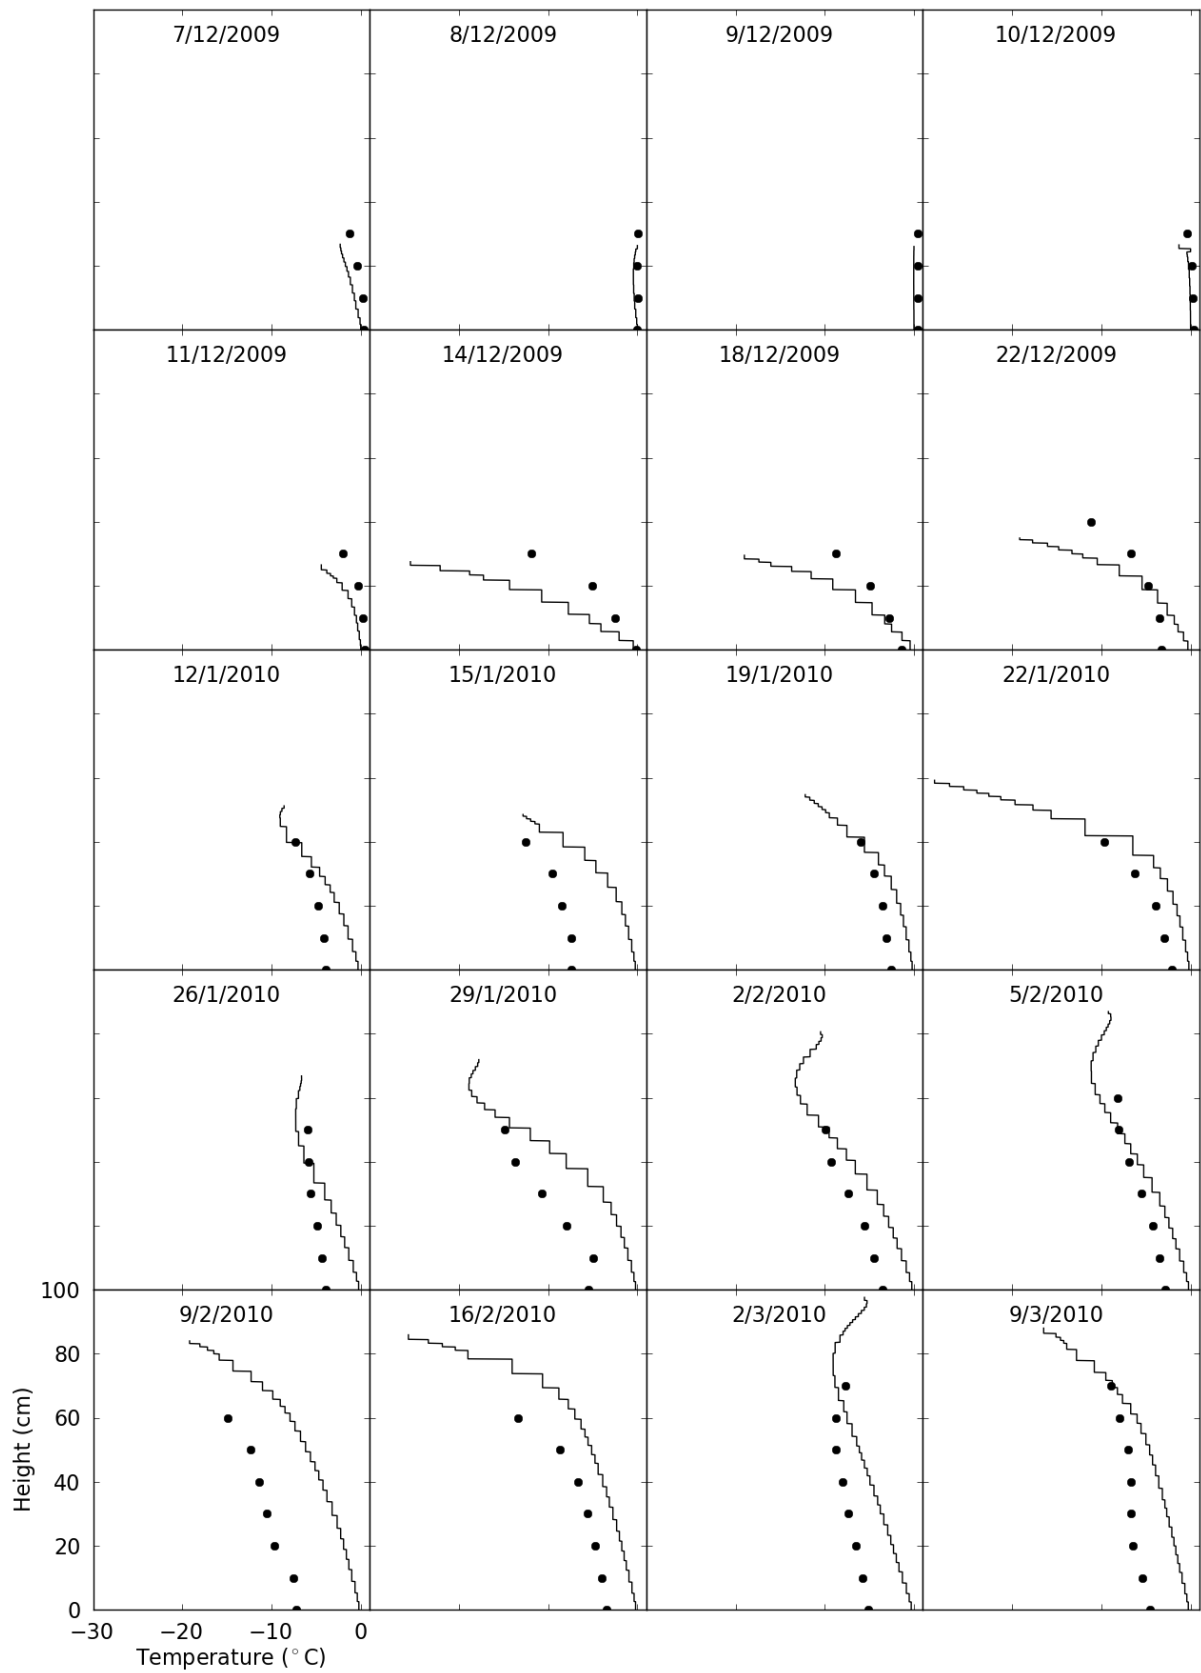

**Figure S3.** Continued

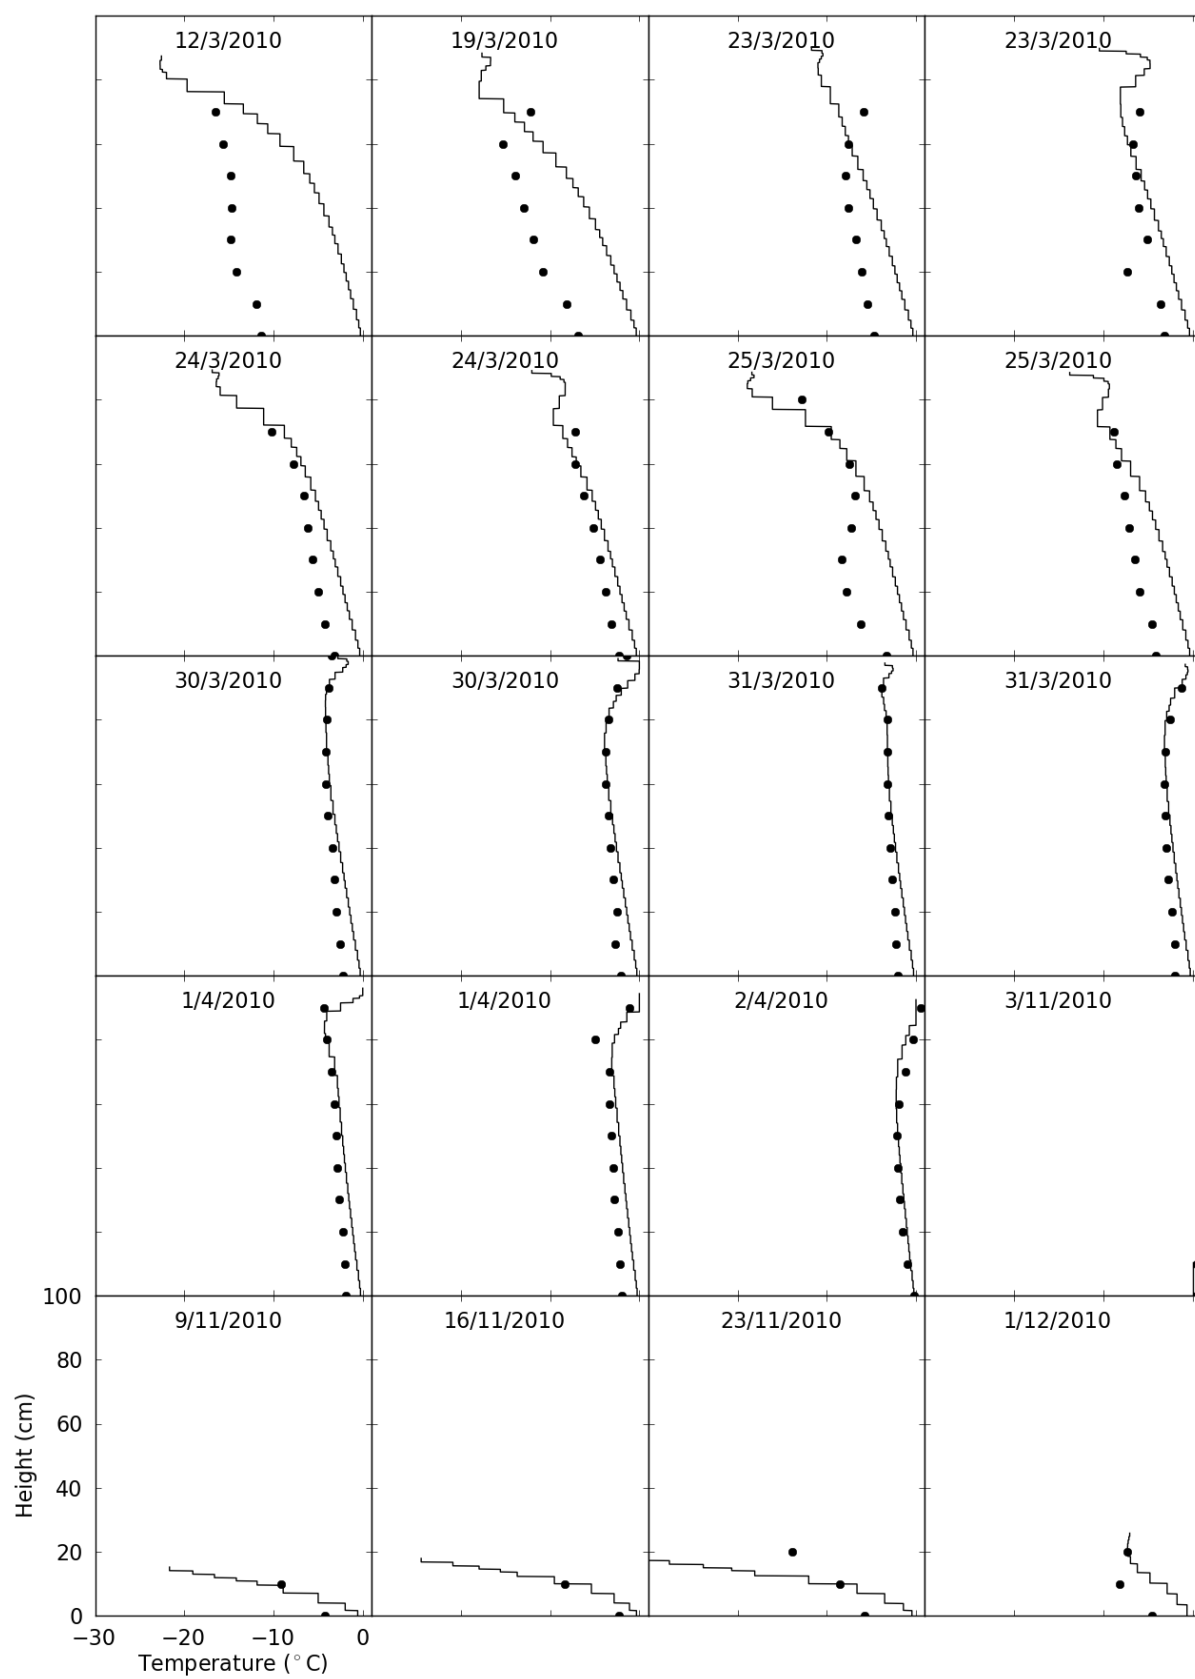

**Figure S3.** Continued

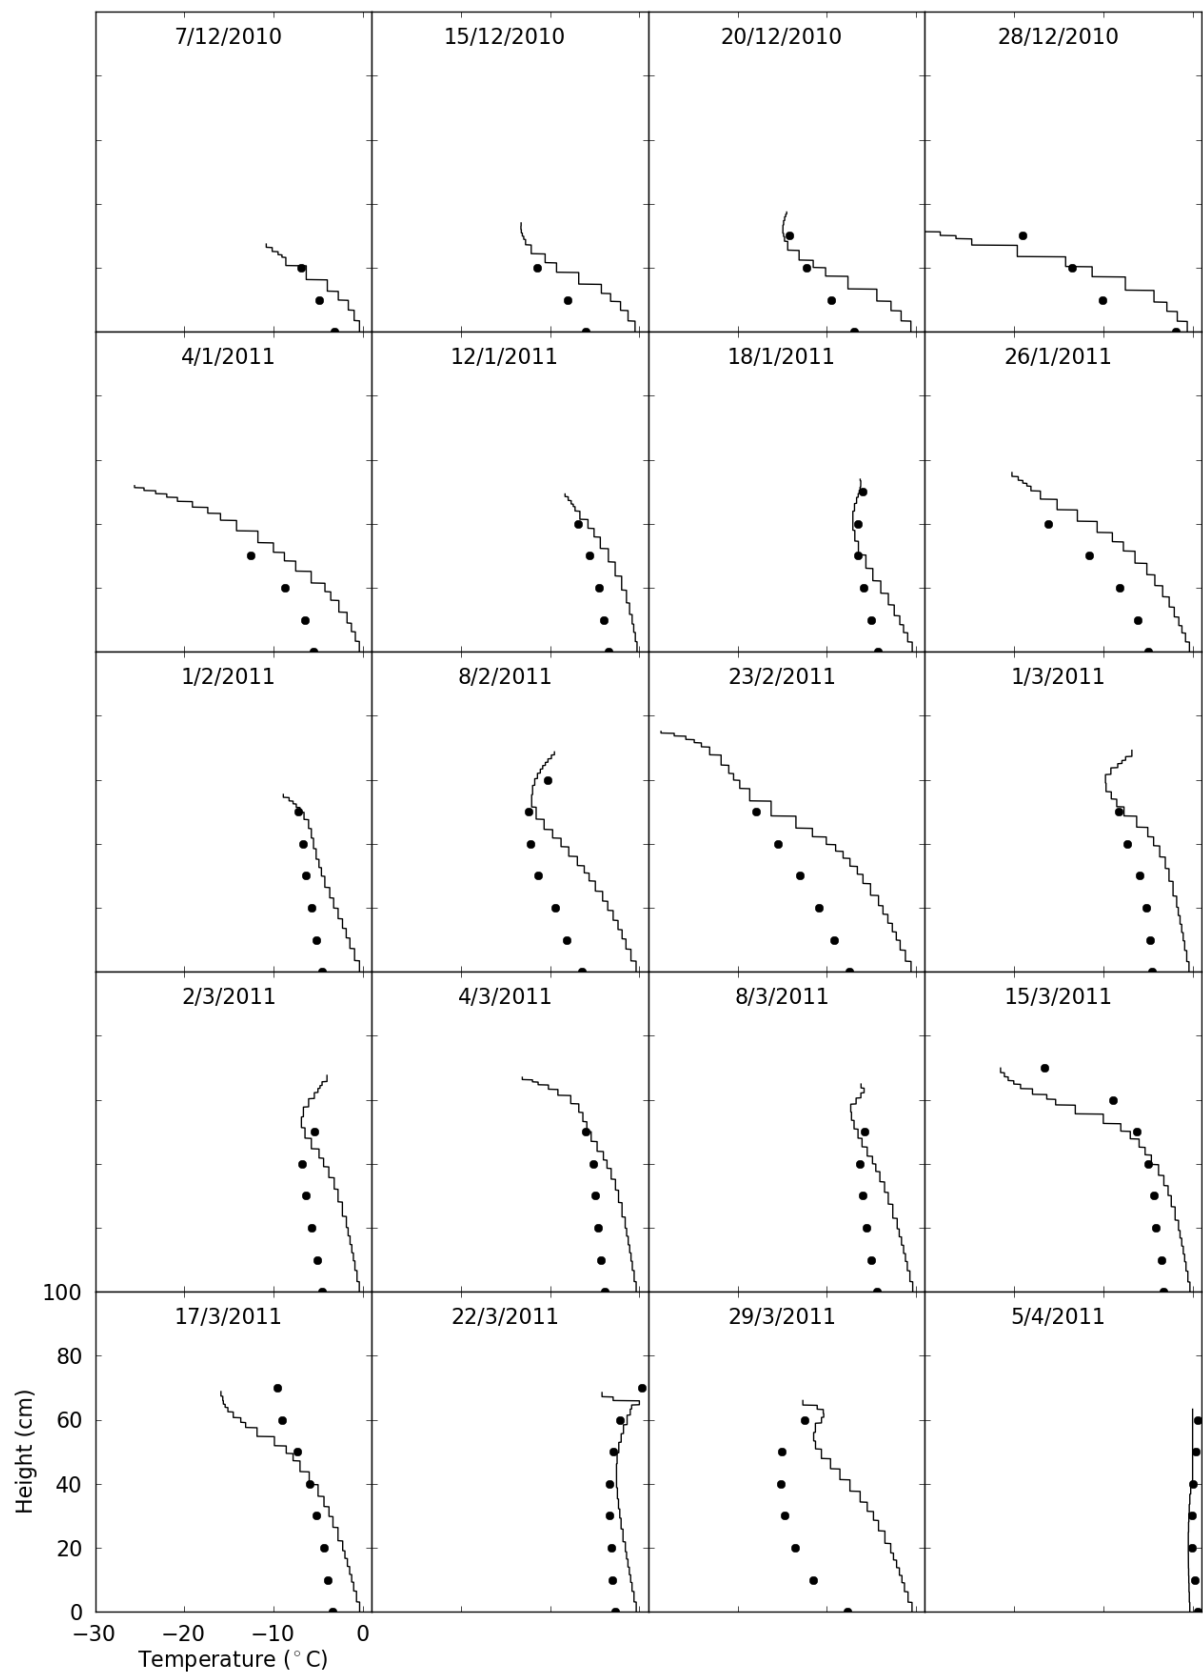

**Figure S3. Continued**

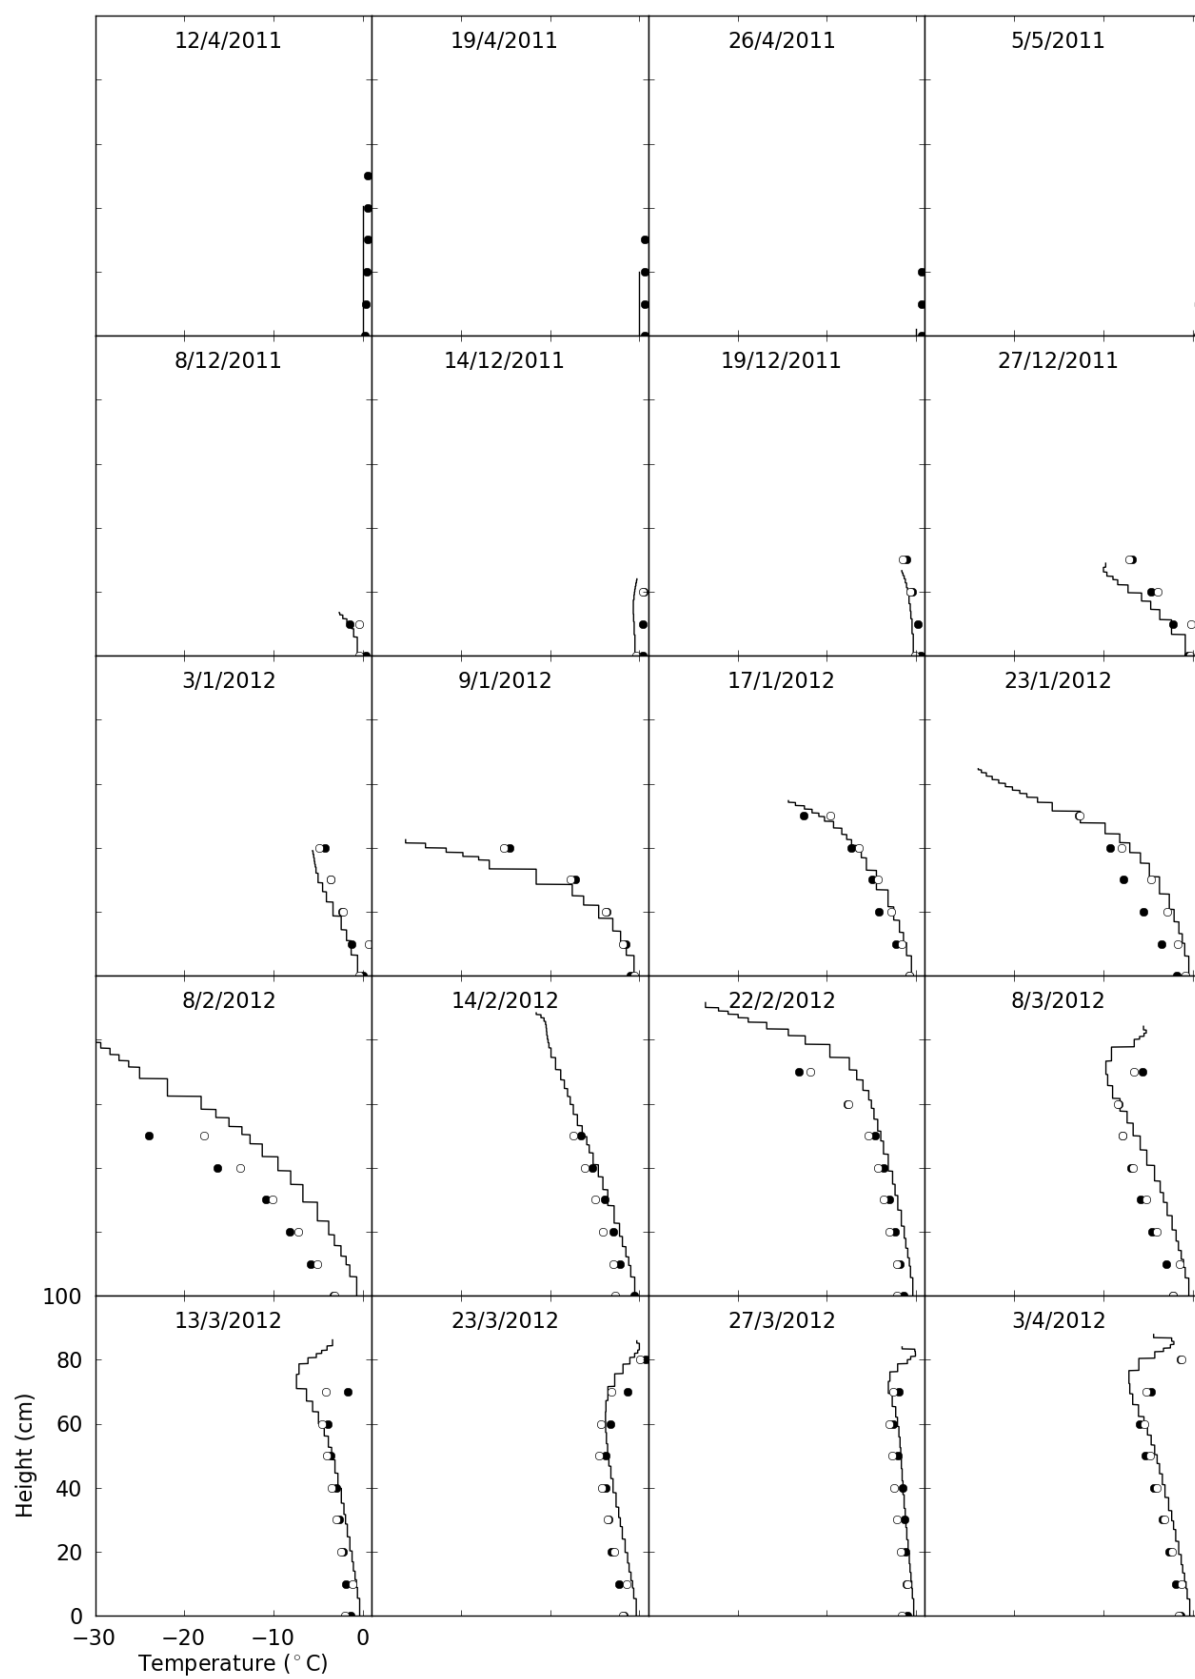

**Figure S3.** Continued

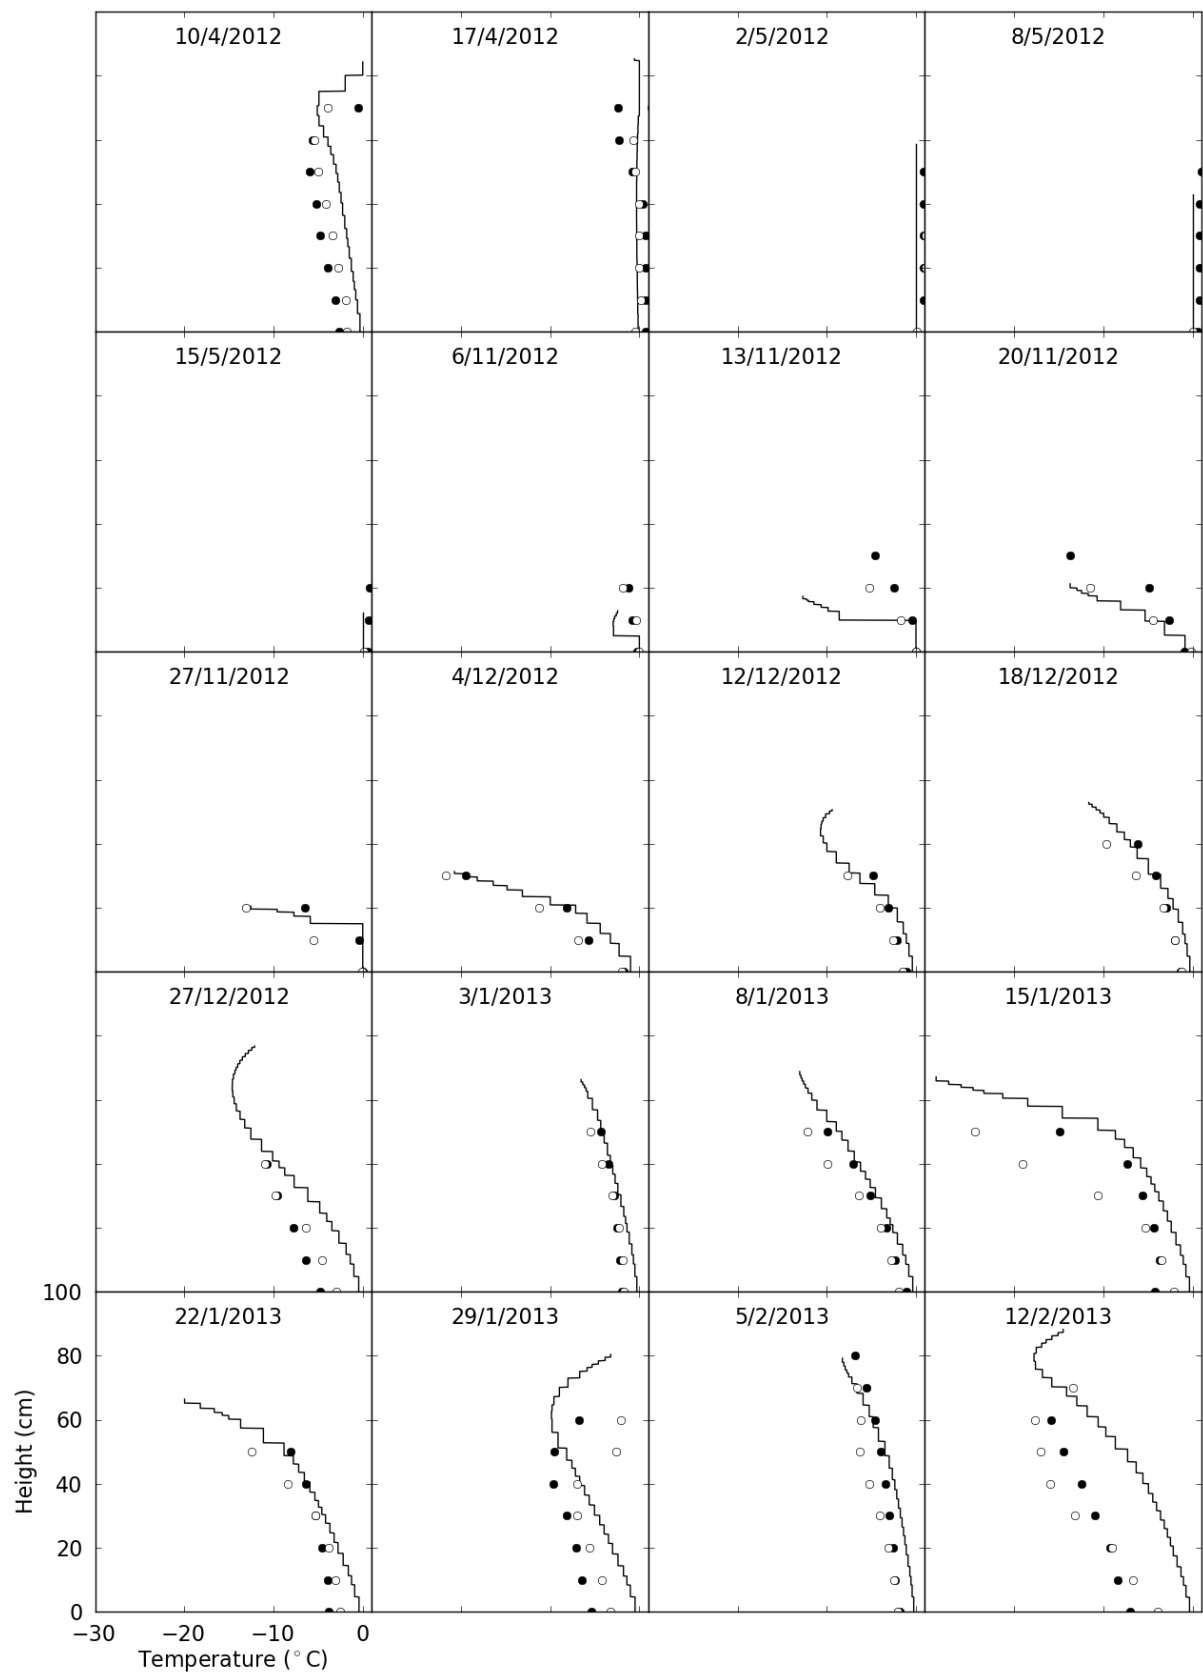

**Figure S3. Continued**

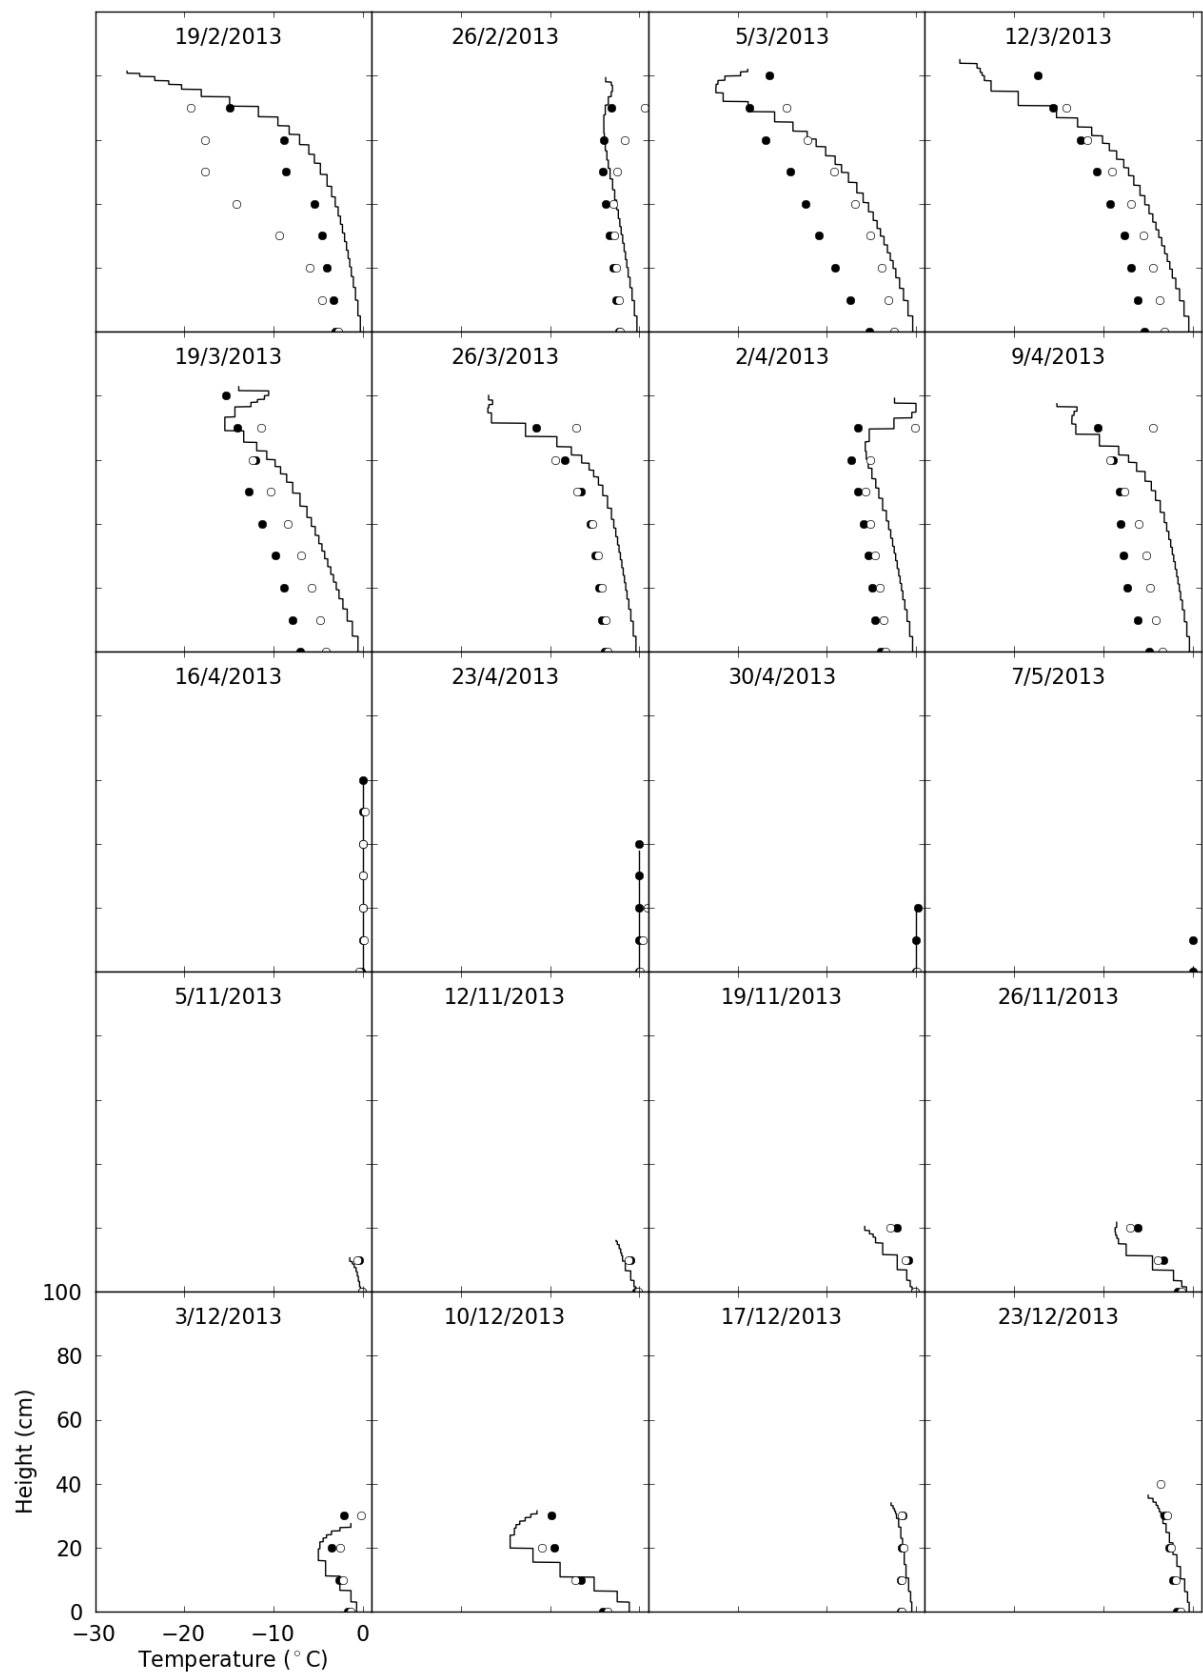

**Figure S3.** Continued

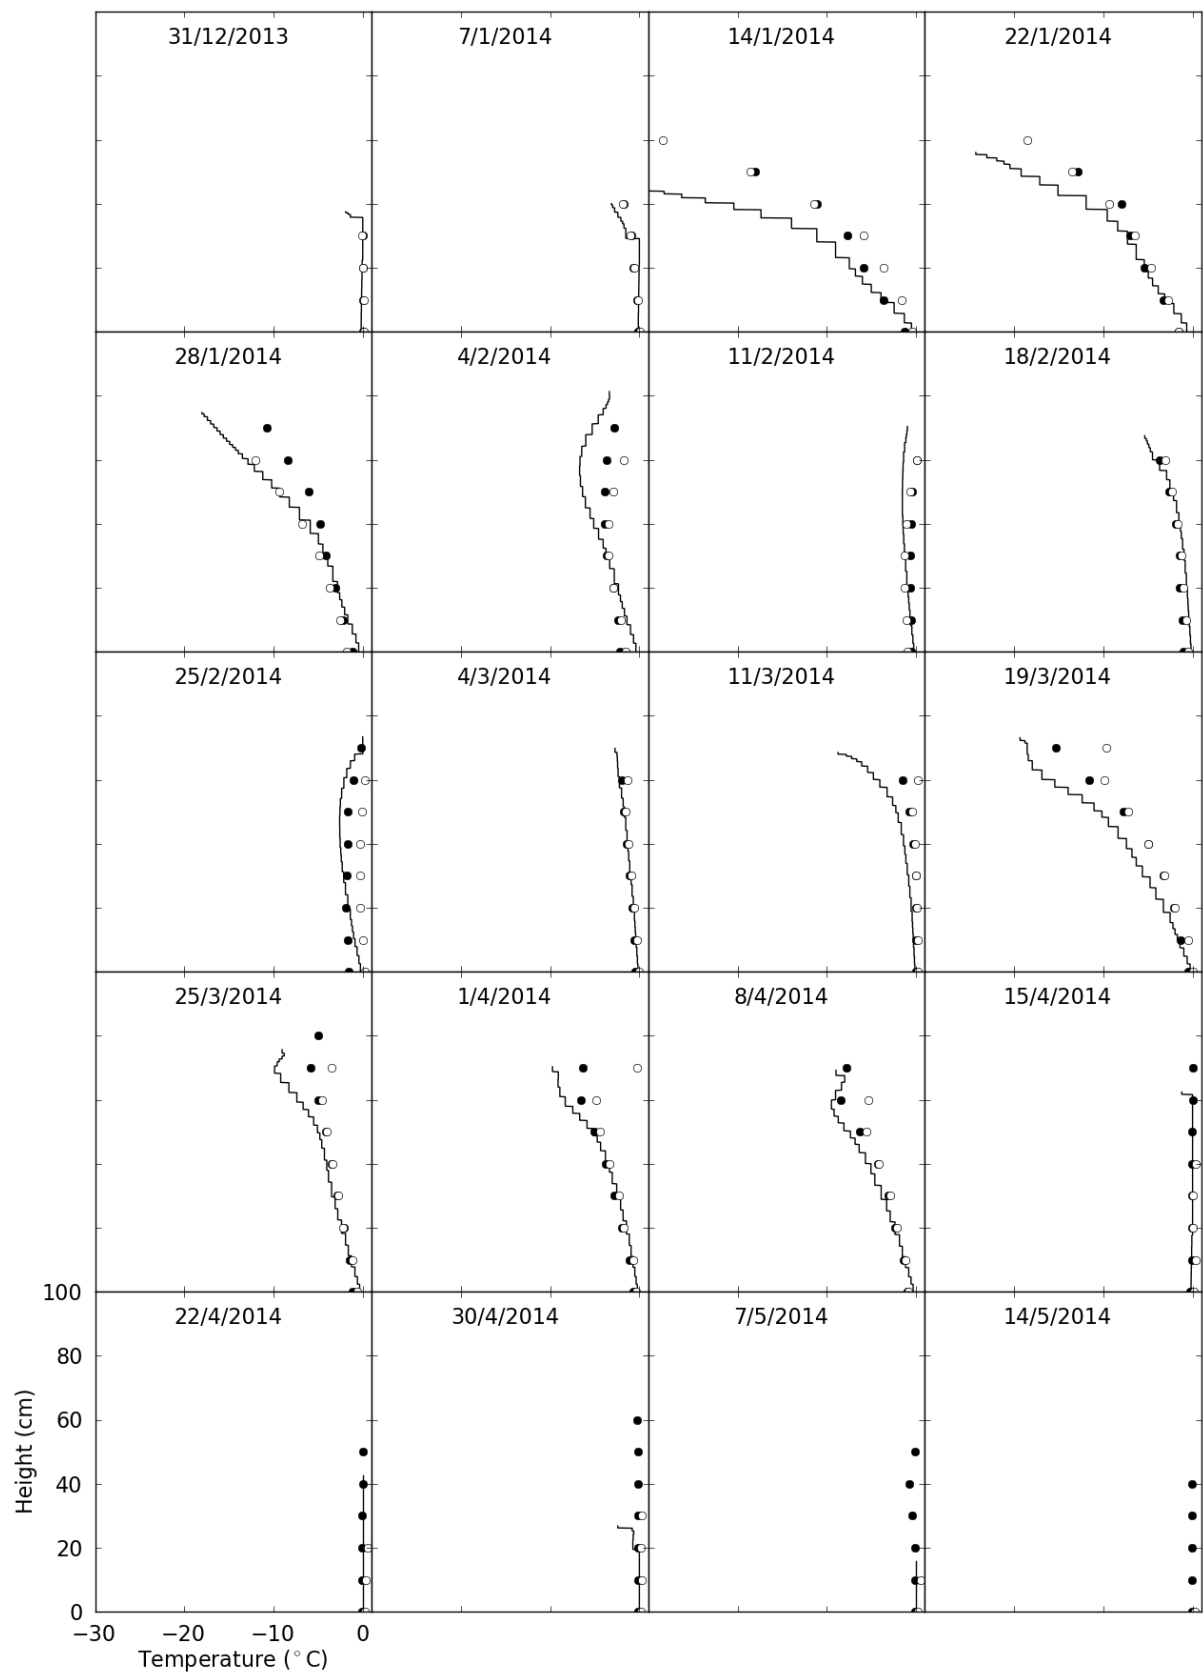

Supplement: Supplementary file 1 [file gi-5-219-2016-supplement.pdf]
